# Supplementary material
Source: PubMed Central journal article supplement (PMC3122908)
Supplement: supp_D015735_jlr.D015735-1.pdf [file supp_D015735_jlr.D015735-1.pdf]

**Figure S1**

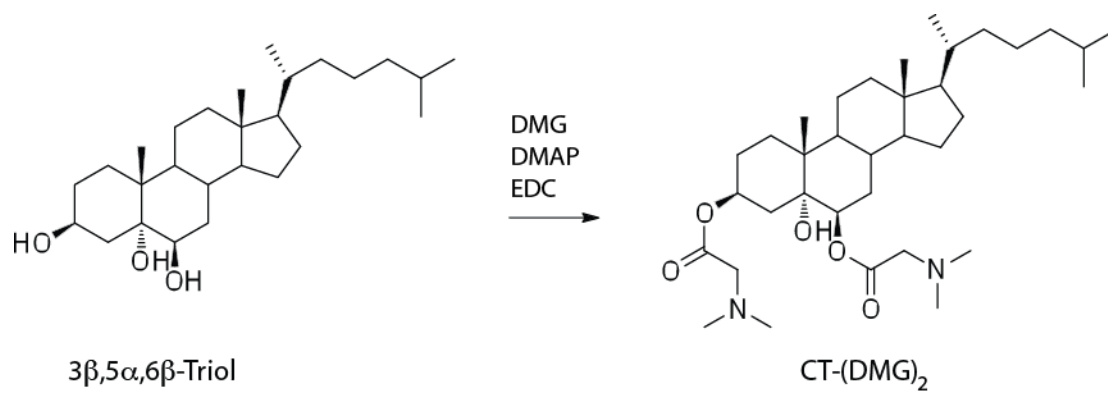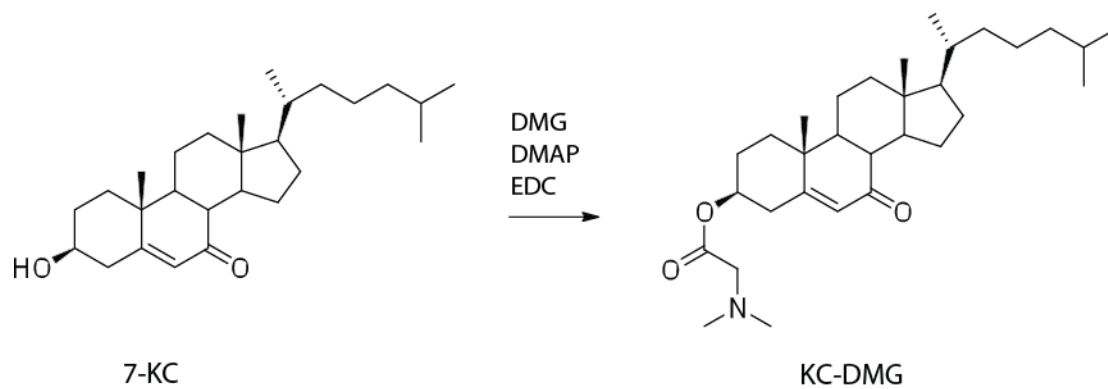

**Table S1.** Branching ratio of 3 $\beta$ ,5 $\alpha$ ,6 $\beta$ -triol and 7-KC in plasma and ULOQ samples

| Sample   | 3 $\beta$ ,5 $\alpha$ ,6 $\beta$ -triol |                        | 7-KC            |                        |
|----------|-----------------------------------------|------------------------|-----------------|------------------------|
|          | Branching ratio                         | % Difference from ULOQ | Branching ratio | % Difference from ULOQ |
| Plasma-1 | 0.818                                   | 7.35                   | 1.198           | -8.06                  |
| Plasma-2 | 0.827                                   | 8.53                   | 1.239           | -4.91                  |
| Plasma-3 | 0.805                                   | 5.64                   | 1.215           | -6.75                  |
| Plasma-4 | 0.687                                   | -9.84                  | 1.228           | -5.76                  |
| Plasma-5 | 0.779                                   | 2.23                   | 1.233           | -5.37                  |
| Plasma-6 | 0.691                                   | -9.32                  | 1.207           | -7.37                  |
| ULOQ     | 0.762                                   | 0.00                   | 1.303           | 0.00                   |

**Table S2.** Dilution integration of 3 $\beta$ ,5 $\alpha$ ,6 $\beta$ -triol and 7-KC in plasma

| dilution (n)          | 3 $\beta$ ,5 $\alpha$ ,6 $\beta$ -triol |         | 7-KC   |         |
|-----------------------|-----------------------------------------|---------|--------|---------|
|                       | 5x (3)                                  | 10x (3) | 5x (3) | 10x (3) |
| concentration (ng/ml) | 811.8                                   | 811.8   | 820.1  | 820.1   |
| mean                  | 749                                     | 699     | 786    | 766     |
| SD                    | 23.7                                    | 20.5    | 18.9   | 11.6    |
| %CV                   | 3.2                                     | 2.9     | 2.4    | 1.5     |
| %RE                   | -7.7                                    | -14.0   | -4.1   | -6.6    |

**Table S3.** Stock solution and standard matrix stability data

| Run ID                                                                        | concentration<br>(ng/ml) | 3 $\beta$ ,5 $\alpha$ ,6 $\beta$ -triol | 7- KC |
|-------------------------------------------------------------------------------|--------------------------|-----------------------------------------|-------|
|                                                                               |                          | 400                                     | 400   |
| Stock<br>solution,<br>-20 °C for<br>42 days<br>n=6                            | mean                     | 379.3                                   | 387.7 |
|                                                                               | SD                       | 10.1                                    | 13.7  |
|                                                                               | %CV                      | 2.7                                     | 3.5   |
|                                                                               | %RE                      | -5.2                                    | -3.1  |
| Stock<br>solution,<br>bench-top at<br>room<br>temperature<br>for 24 h<br>n=3  | mean                     | 400.3                                   | 399.3 |
|                                                                               | SD                       | 10.8                                    | 14.2  |
|                                                                               | %CV                      | 2.7                                     | 3.6   |
|                                                                               | %RE                      | 0.1                                     | -0.2  |
| Standard<br>matrix, at<br>-20°C for 42<br>days<br>n=3                         | mean                     | 351.3                                   | 344.7 |
|                                                                               | SD                       | 7.2                                     | 5.5   |
|                                                                               | %CV                      | 2.1                                     | 1.6   |
|                                                                               | %RE                      | -12.2                                   | -13.8 |
| Standard<br>matrix,<br>bench-top at<br>room<br>temperature<br>for 24 h<br>n=3 | mean                     | 388                                     | 392.3 |
|                                                                               | SD                       | 6.2                                     | 6.5   |
|                                                                               | %CV                      | 1.6                                     | 1.7   |
|                                                                               | %RE                      | -3                                      | -1.9  |
